# Supplementary material
Source: publisher figshare collection journal article supplement (https://karger.figshare.com/ndownloader/files/30842911)
Supplement: Supplementary file 1 [file 30842911]

**Table 4S(online suppl.):** Confounding Factors of %time with high Signal Quality of Electrical Cardiometry

| **Factor** | **Statistical test** | **Statistics** | **p** |
| --- | --- | --- | --- |
| Gestational Age | Spearman’s correlation coefficient | rs=-0.047 | 0.836 |
| Birth weight | Spearman’s correlation coefficient | rs=-0.053 | 0.816 |
| Sex | Mann-Whitney U test | Female(n=9)  75.7(65.9 to 78.6)  Male(n=13)  72.3(58.0 to 82.7) | 0.744 |
| Artefact | Mann-Whitney U test | No(n=16)  76.6(59.3 to 82.7)  Yes (n=6)  70.9(59.5 to 73.6) | p=0.203 |

rs: Spearman’s rho, otherwise results are presented as Median(IQR)
